# Supplementary material for: A new on-line SPE LC-HRMS method for simultaneous analysis of selected emerging contaminants in surface waters
Source: Royal Society of Chemistry journal article supplement (doi:10.1039/d2ay01574a), 2022-12-16
Supplement: d2ay01574a1.pdf [file d2ay01574a1.pdf]

1 **A New On-line SPE LC-HRMS Method for Simultaneous Analysis of Selected Emerging**  
2 **Contaminants in Surface Waters**

3 **Omotola Folorunsho<sup>1</sup>, Anna Bogush<sup>1</sup> and Ivan Kourtchev<sup>1\*</sup>**

4 <sup>1</sup>Centre for Agroecology Water and Resilience (CAWR), Coventry University, Wolston Lane, Ryton on  
5 Dunsmore, CV8 3LG, UK.

6 \*Corresponding author

7 Email address: [ivan.kourtchev@coventry.ac.uk](mailto:ivan.kourtchev@coventry.ac.uk)

8

9 [Supplementary Information](#)

10

11

12

13

14

15

16

17

18

19

20

21

22

23

24

25

26

27

28

29

30

31

32

|    |                 |   |
|----|-----------------|---|
| 33 | <b>Contents</b> |   |
| 34 | Table S1.....   | 3 |
| 35 | Table S2.....   | 4 |
| 36 | Table S3.....   | 5 |
| 37 | Table S4.....   | 6 |
| 38 | References..... | 8 |

39

40

41

42

43

44

45

46

47

48

49

50

51

52

53

54

55

56

57

58

59

60

61

62

63

64

65 Table S1. PFAS analytes and isotopically labelled standards, abbreviations, target ions and retention time (RT).

|    | <b>PFAS analyte</b>                                         | <b>Abbreviation</b> | <b>m/z target ion</b> | <b>RT, min</b> | <b>Internal standard</b> |
|----|-------------------------------------------------------------|---------------------|-----------------------|----------------|--------------------------|
| 66 | Perfluoro-3-methoxypropanoic acid                           | PFMPA               | 228.97411             | 1.69           | M5PFPeA                  |
| 67 | Perfluoropentanoic acid                                     | PFPeA               | 262.97601             | 2.15           | M5PFPeA                  |
| 68 | Perfluoropentanoic acid- <sup>13</sup> C <sub>5</sub>       | M5PFPeA             | 267.99278             | 2.15           |                          |
| 69 | Perfluorobutane sulfonic acid                               | L-PFBS              | 298.94299             | 2.34           | M3PFBS                   |
|    | Perfluorobutane sulfonic acid, <sup>13</sup> C <sub>3</sub> | M3PFBS              | 301.95306             | 2.34           |                          |
|    | Perfluoro-4-methoxybutanoic acid                            | PFMBA               | 278.97092             | 2.40           | M3PFBS                   |
|    | Perfluoro (2-ethoxyethane) sulfonic acid                    | PFEESA              | 314.93791             | 2.68           | M3PFBS                   |
|    | 4:2 fluorotelomer sulfonate                                 | 4:2FTS              | 326.97429             | 2.92           | M2-4:2FTS                |
|    | 4:2 fluorotelomer sulfonate, <sup>13</sup> C <sub>2</sub>   | M2-4:2FTS           | 328.98100             | 2.92           |                          |
|    | Perfluorohexanoic acid                                      | PFHxA               | 312.97281             | 3.01           | M5PFHxA                  |
|    | Perfluorohexanoic acid- <sup>13</sup> C <sub>5</sub>        | M5PFHxA             | 317.98959             | 3.01           |                          |
|    | Perfluoropentane sulfonic acid                              | L-PFPeS             | 348.93980             | 3.17           | M5PFHxA                  |
|    | Perfluoroheptanoic acid                                     | PFHpA               | 362.96962             | 3.90           | M4PFHpA                  |
|    | Perfluoroheptanoic acid, <sup>13</sup> C <sub>4</sub>       | M4PFHpA             | 366.98304             | 3.90           |                          |
|    | Perfluorohexane sulfonic acid                               | L-PFHxS             | 398.93660             | 3.99           | M3PFHxS                  |
|    | Perfluorohexane sulfonic acid, <sup>13</sup> C <sub>3</sub> | M3PFHxS             | 401.94667             | 3.99           |                          |
|    | Sodium dodecafluoro-3H-4, 8-dioxanonoate                    | NaDONA              | 376.96887             | 4.00           | M3PFHxS                  |
|    | 6:2 fluorotelomer sulfonate                                 | 6:2FTS              | 426.96790             | 4.64           | M2-6:2-FTS               |
|    | 6:2 fluorotelomer sulfonate, <sup>13</sup> C <sub>2</sub>   | M2-6:2FTS           | 428.97461             | 4.64           |                          |
|    | Perfluorooctanoic acid                                      | PFOA                | 412.96643             | 4.69           | M8PFOA                   |
|    | Perfluorooctanoic acid, <sup>13</sup> C <sub>8</sub>        | M8PFOA              | 420.99326             | 4.69           |                          |
|    | Perfluoroheptane sulfonic acid                              | PFHpS               | 448.93341             | 4.79           | M8PFOA                   |
|    | Perfluorononanoic acid                                      | PFNA                | 462.96323             | 5.38           | M9PFNA                   |
|    | Perfluorononanoic acid, <sup>13</sup> C <sub>9</sub>        | M9PFNA              | 471.99343             | 5.38           |                          |
|    | Perfluorooctane sulfonic acid                               | L-PFOS              | 498.93022             | 5.41           | M8PFOS                   |
|    | Perfluorooctane sulfonic acid, <sup>13</sup> C <sub>8</sub> | M8PFOS              | 506.95706             | 5.41           |                          |
|    | Perfluoro(2-((6-chlorohexyl)oxy)ethanesulfonic acid)        | 9 Cl-PF3ONS         | 530.89558             | 5.76           | M2-8:2-FTS               |
|    | 8:2 fluorotelomer sulfonate                                 | 8:2FTS              | 526.96152             | 5.97           | M2-8:2-FTS               |
|    | 8:2 fluorotelomer sulfonate, <sup>13</sup> C <sub>2</sub>   | M2-8:2-FTS          | 528.96823             | 5.97           |                          |
|    | Perfluorodecanoic acid                                      | PFDA                | 512.96004             | 5.98           | M6PFDA                   |
|    | Perfluorodecanoic acid, <sup>13</sup> C <sub>6</sub>        | M6PFDA              | 518.98017             | 5.98           |                          |
|    | Perfluoroundecanoic acid                                    | PFUDA               | 562.95684             | 6.51           | M7PFUdA                  |
|    | Perfluoroundecanoic acid, <sup>13</sup> C <sub>7</sub>      | M7PFUdA             | 569.98033             | 6.51           |                          |
|    | 11-Chloroeicosafluoro-3-oxaundecane-1-sulfonic acid         | 11 Cl-PF3OUdS       | 630.88919             | 6.76           | M7PFUdA                  |
|    | Perfluorododecanoic acid                                    | PFDoA               | 612.95365             | 6.97           | MPFDoA                   |
|    | Perfluorododecanoic acid, <sup>13</sup> C <sub>2</sub>      | MPFDoA              | 614.96036             | 6.97           |                          |

71 Table S2. Pharmaceuticals, pesticide, bisphenol analytes and internal standards, target ions and retention  
 72 time (RT) using Negative (-) and Positive (+) Electrospray Ionisation (ESI) in Selected Ion Monitoring (SIM).

73

| 74 | <b>Analytes</b>            | <b>m/z target ion</b> | <b>RT,<br/>min</b> | <b>Internal standard</b>   | <b>Ionisation<br/>Mode</b> |
|----|----------------------------|-----------------------|--------------------|----------------------------|----------------------------|
| 75 | Propamocarb                | 189.15975             | 1.18               | Propamocarb-D <sub>7</sub> | positive                   |
| 76 | Tepraloxdim                | 342.14666             | 2.56               | Atrazine-D <sub>5</sub>    | positive                   |
| 77 | Carboxin                   | 236.07398             | 3.02               | Atrazine-D <sub>5</sub>    | positive                   |
| 78 | Atrazine                   | 216.10105             | 3.47               | Atrazine-D <sub>5</sub>    | positive                   |
| 79 | DEET                       | 192.13829             | 3.62               | Atrazine-D <sub>5</sub>    | positive                   |
| 80 | Propachlor                 | 296.02396             | 3.66               | Atrazine-D <sub>5</sub>    | positive                   |
| 81 | Diclofenac                 | 212.08367             | 3.72               | Atrazine-D <sub>5</sub>    | positive                   |
| 82 | Ibuprofen                  | 205.12340             | 3.96               | Reserpine                  | negative                   |
| 83 | Paracetamol                | 152.07061             | 4.31               | Atrazine-D <sub>5</sub>    | positive                   |
| 84 | Terbutylazine              | 230.11670             | 4.55               | Atrazine-D <sub>5</sub>    | positive                   |
| 85 | Dimethomorph               | 388.13101             | 4.85               | Atrazine-D <sub>5</sub>    | positive                   |
| 86 | Malathion                  | 331.04334             | 4.97               | Atrazine-D <sub>5</sub>    | positive                   |
| 87 | Prometryn                  | 242.14339             | 5.27               | Atrazine-D <sub>5</sub>    | positive                   |
| 88 | Acetochlor                 | 270.12553             | 5.46               | Atrazine-D <sub>5</sub>    | positive                   |
| 89 | Metolachlor                | 284.14118             | 5.22               | Atrazine-D <sub>5</sub>    | positive                   |
| 90 | Phoxim                     | 299.06138             | 6.44               | Atrazine-D <sub>5</sub>    | positive                   |
| 91 | Prosulfocarb               | 252.14166             | 7.02               | Atrazine-D <sub>5</sub>    | positive                   |
| 92 | Ethion                     | 384.99489             | 7.68               | Atrazine-D <sub>5</sub>    | positive                   |
| 93 | Bisphenol S                | 249.02270             | 1.81               | Reserpine                  | negative                   |
| 94 | Bisphenol B                | 241.12340             | 4.51               | Reserpine                  | negative                   |
| 95 | Atrazine D <sub>5</sub>    | 221.13243             | 3.47               |                            | positive                   |
| 96 | Propamocarb D <sub>7</sub> | 196.20369             | 1.18               |                            | positive                   |
| 97 | Reserpine                  | 607.26610             | 6.45               |                            | negative                   |
| 98 | Reserpine                  | 609.28066             | 6.43               |                            | positive                   |

93

94

95

96

97

98

99

100

101

102

103

104

105

106 Table S3. On-line SPE, UHPLC and MS conditions for ECs analysis (adapted from Kourtchev *et al.*,<sup>1</sup>)

|                                 | <b>On-line SPE. conditions</b> |                            |                            | <b>UPLC conditions</b>                                   |      |                            |
|---------------------------------|--------------------------------|----------------------------|----------------------------|----------------------------------------------------------|------|----------------------------|
| <b>Mobile phase</b>             | A: 0.1% Formic acid in water   |                            |                            | A: 2 mM ammonium acetate in water/methanol, 90/10 (v/v)) |      |                            |
|                                 | B: Methanol                    |                            |                            | B: Methanol                                              |      |                            |
| <b>Gradient method</b>          | Time, min                      | %B                         | Flow, mL min <sup>-1</sup> | Time, min                                                | %B   | Flow, mL min <sup>-1</sup> |
|                                 | 0                              | 0                          | 1                          | 0                                                        | 0    | 0.3                        |
|                                 | 5                              | 0                          | 1                          | 1                                                        | 0    | 0.3                        |
|                                 | 5.1                            | 100                        | 3                          | 1.1                                                      | 33.3 | 0.3                        |
|                                 | 6.5                            | 100                        | 3                          | 9                                                        | 88.9 | 0.3                        |
|                                 | 6.6                            | 0                          | 3                          | 12                                                       | 98.9 | 0.3                        |
|                                 | 9                              | 0                          | 3                          | 18                                                       | 98.9 | 0.3                        |
|                                 | 9.1                            | 0                          | 0.5                        | 18.1                                                     | 0    | 0.3                        |
|                                 |                                |                            | 22                         | 0                                                        | 0.3  |                            |
| <b>Column temperature (°C)</b>  | 25                             |                            |                            | 35                                                       |      |                            |
| <b>Injection volume, mL</b>     | 1                              |                            |                            |                                                          |      |                            |
| <b>On-line SPE Pump status</b>  |                                |                            |                            |                                                          |      |                            |
| <b>Time, min</b>                |                                | <b>Loading pump status</b> |                            | <b>Eluting pump status</b>                               |      |                            |
| 0                               |                                | To SPE column              |                            | Direct to analytical column                              |      |                            |
| 1                               |                                | To waste                   |                            | To SPE & onto analytical columns                         |      |                            |
| 19.1                            |                                | To SPE column              |                            | Direct to analytical column                              |      |                            |
| <b>MS conditions</b>            |                                |                            |                            |                                                          |      |                            |
| <b>ESI parameters</b>           |                                |                            | <b>SIM parameters</b>      |                                                          |      |                            |
| <b>Spray voltage (kV)</b>       |                                | 3.5                        |                            | <b>dd-MS2</b>                                            |      | Confirmation               |
| <b>Sheath gas flow rate</b>     |                                | 40                         |                            | <b>Resolution</b>                                        |      | 70,000                     |
| <b>Capillary temp. (°C)</b>     |                                | 325                        |                            | <b>Isolation window</b>                                  |      | 1 m/z                      |
| <b>Aux gas flow rate</b>        |                                | 10                         |                            | <b>AGC target</b>                                        |      | 5e4                        |
| <b>Aux gas heater temp (°C)</b> |                                | 300                        |                            | <b>Maximum IT.</b>                                       |      | Auto                       |
| <b>Sweep gas flow rate</b>      |                                | 0                          |                            | <b>Loop count</b>                                        |      | 1                          |
|                                 |                                |                            |                            | <b>MSX count</b>                                         |      | 10                         |

107

108

109

110

111

112

113

114

115

116

117

118

119

120 Table S4. Accuracy and precision of analytes.

| <b>Analytes</b>          | <b>Accuracy,<br/>%RE</b>       | <b>Precision,<br/>%RSD</b> | <b>Accuracy,<br/>%RE</b>      | <b>Precision,<br/>%RSD.</b> | <b>Accuracy,<br/>%RE</b>      | <b>Precision<br/>, %RSD</b> | <b>Accuracy,<br/>%RE</b>      | <b>Precision,<br/>%RSD</b> |
|--------------------------|--------------------------------|----------------------------|-------------------------------|-----------------------------|-------------------------------|-----------------------------|-------------------------------|----------------------------|
| <b><i>PFAS</i></b>       | <b>0.25 pg mL<sup>-1</sup></b> |                            | <b>0.6 pg mL<sup>-1</sup></b> |                             | <b>3.5 pg mL<sup>-1</sup></b> |                             | <b>7.5 pg mL<sup>-1</sup></b> |                            |
| PFMPA                    | 12.0                           | 0                          | -7.0                          | 10.7                        | 1.1                           | 4.8                         | -14.9                         | 5.9                        |
| PFPeA                    | -10.7                          | 4.9                        | -3.9                          | 1.5                         | -3.1                          | 0.4                         | 2.6                           | 0.5                        |
| L-PFBS                   | 2.3                            | 6.6                        | -15.6                         | 13.2                        | 2.6                           | 3.7                         | -5.3                          | 4.4                        |
| PFMBA                    | 10.1                           | 16.4                       | -16.5                         | 16.3                        | -4.7                          | 11.8                        | -16.4                         | 10.4                       |
| PFEESA                   | 15.7                           | 6.4                        | -8.0                          | 5.5                         | 1.7                           | 3.3                         | -6.2                          | 5.2                        |
| 4:2 FTS                  | 7.1                            | 18.5                       | -7.6                          | 1.7                         | 1.7                           | 4.8                         | -5.6                          | 5.4                        |
| PFHxA                    | -17.1                          | 16.2                       | -14.8                         | 7.6                         | 1.7                           | 8.8                         | -5.9                          | 4.6                        |
| L-PFPeS                  | -2.5                           | 2.6                        | -8.1                          | 2.1                         | 2.2                           | 7.1                         | -4.6                          | 3.0                        |
| PFHpA                    | 16.9                           | 19.4                       | -5.1                          | 4.0                         | 1.9                           | 8.4                         | -5.8                          | 5.4                        |
| PFHxS                    | -11.5                          | 9.3                        | -5.7                          | 5.3                         | -1.6                          | 4.4                         | -4.6                          | 6.2                        |
| NaDONA                   | 9.5                            | 2.0                        | -8.7                          | 2.2                         | 0.3                           | 5.4                         | -6.9                          | 4.0                        |
| 6:2 FTS                  | -1.1                           | 12.1                       | -10.1                         | 3.2                         | 0.0                           | 6.1                         | -6.5                          | 4.3                        |
| PFOA                     | 14.8                           | 12.4                       | -12.2                         | 2.8                         | 3.1                           | 7.3                         | -5.2                          | 5.0                        |
| L-PFHpS                  | 5.2                            | 6.8                        | -7.3                          | 1.9                         | 4.6                           | 6.3                         | -3.3                          | 4.9                        |
| PFNA                     | 17.1                           | 7.0                        | -8.5                          | 1.4                         | 2.4                           | 5.2                         | -6.3                          | 5.2                        |
| PFOS                     | 15.5                           | 7.3                        | -12.2                         | 1.9                         | -1.0                          | 4.9                         | -6.8                          | 4.3                        |
| 9CI-PF3ONS               | -10.9                          | 4.7                        | -8.5                          | 2.5                         | 4.6                           | 3.3                         | -5.0                          | 5.9                        |
| 8:2 FTS                  | 10.2                           | 20.7                       | -4.7                          | 2.2                         | 0.1                           | 3.9                         | -5.2                          | 3.8                        |
| PFDA                     | 5.0                            | 14.9                       | -10.4                         | 4.7                         | 3.9                           | 4.6                         | -2.7                          | 4.1                        |
| PFUdA                    | 11.1                           | 13.1                       | -11.8                         | 5.6                         | 1.6                           | 4.8                         | -6.0                          | 4.2                        |
| 11CI-PF3OUdS             | 5.2                            | 13.8                       | -8.4                          | 6.7                         | 6.7                           | 14.7                        | -7.7                          | 15.3                       |
| PFDoA                    | 17.9                           | 13.8                       | -12.8                         | 5.6                         | -3.8                          | 4.6                         | -7.5                          | 4.8                        |
| <b><i>Pesticides</i></b> | <b>1.5 pg mL<sup>-1</sup></b>  |                            | <b>6 pg mL<sup>-1</sup></b>   |                             | <b>20 pg mL<sup>-1</sup></b>  |                             | <b>70 pg mL<sup>-1</sup></b>  |                            |
| Propamocarb              | >20                            | >20                        | 15.4                          | 4.4                         | -0.07                         | 4.6                         | -0.9                          | 6.2                        |
| Tepraloxydim             | 7.5                            | 10.4                       | 5.9                           | 8.7                         | 8.9                           | 14.8                        | -1.9                          | 4.9                        |
| Carboxin                 | 18.5                           | 10.2                       | 15.1                          | 19.5                        | -2.8                          | 5.4                         | -0.2                          | 5.1                        |
| Atrazine                 | 20.3                           | 10.8                       | 14.3                          | 6.8                         | 1.1                           | 5.7                         | 1.1                           | 5.5                        |
| DEET                     | 2.6                            | 9.3                        | 11.2                          | 9.3                         | -4.8                          | 5.1                         | 1.5                           | 6.0                        |
| Propachlor               | -6.6                           | 10.8                       | 12.9                          | 5.4                         | 0.2                           | 5.4                         | 1.0                           | 5.9                        |

|                               |      |                              |      |                              |      |                               |       |                               |
|-------------------------------|------|------------------------------|------|------------------------------|------|-------------------------------|-------|-------------------------------|
| Terbutylazine                 | 16.7 | 9.9                          | 9.1  | 5.8                          | -0.4 | 6.0                           | 2.9   | 5.1                           |
| Dimethomorph                  | 13.1 | 10.7                         | 12.5 | 4.9                          | 2.0  | 4.7                           | 2.4   | 5.0                           |
| Malathion                     | 20.0 | 12.3                         | 14.4 | 5.7                          | 2.0  | 5.1                           | 4.1   | 5.6                           |
| Prometryn                     | >20  | 12.6                         | 12.4 | 5.5                          | 0.6  | 6.1                           | 2.6   | 5.0                           |
| acetochlor                    | >20  | >20                          | 16.1 | 10.2                         | 2.7  | 7.7                           | 7.0   | 5.5                           |
| Metolachlor                   | >20  | 9.6                          | 14.5 | 5.7                          | 2.0  | 6.1                           | 1.5   | 6.3                           |
| Prosulfocarb                  | 19.8 | 12.7                         | 11.8 | 5.3                          | -0.1 | 6.2                           | 0.4   | 6.8                           |
| Ethion                        | 1.2  | >20                          | 16.7 | 10.7                         | 6.9  | 7.4                           | 4.1   | 5.5                           |
| Phoxim                        | -9.8 | 18.1                         | 12.4 | 7.4                          | 8.01 | 7.5                           | 4.7   | 7.1                           |
| <b><u>Pharmaceuticals</u></b> |      |                              |      |                              |      |                               |       |                               |
| Diclofenac                    | >20  | >20                          | -3.7 | 4.9                          | 5.6  | 4.5                           | -0.5  | 5.3                           |
| Paracetamol                   | 18.5 | >20                          | 9.3  | 9.1                          | -4.4 | 5.2                           | -8.4  | 9.4                           |
| Ibuprofen                     | -7.4 | >20                          | 6.7  | 12.8                         | 19.6 | 10.3                          | -15.4 | 6.8                           |
| <b><u>Bisphenols</u></b>      |      |                              |      |                              |      |                               |       |                               |
|                               |      | <b>15 pg mL<sup>-1</sup></b> |      | <b>35 pg mL<sup>-1</sup></b> |      | <b>120 pg mL<sup>-1</sup></b> |       | <b>160 pg mL<sup>-1</sup></b> |
| Bisphenol S                   | 18.1 | -12.7                        | 12.0 | -11.4                        | 2.5  | -5.5                          | 6.9   | -12.6                         |
| Bisphenol B                   | >20  | 14.4                         | 11.5 | -2.0                         | 1.2  | -9.0                          | 0.4   | -0.8                          |

122 **Reference**

- 123 1 I. Kourtchev, S. Hellebust, E. Hefferman, J. Wenger, S. Towers, E. Diapouli, and K.  
124 Eleftheriadis, *Sci. Total Environ.*, 2022, DOI: 10.1016/j.scitotenv.2022.1554
